# Supplementary material for: Clinical Significance of Peritumoral Adipose Tissue PET/CT Imaging Features for Predicting Axillary Lymph Node Metastasis in Patients with Breast Cancer
Source: MDPI journal article supplement (doi:10.3390/jpm11101029), 2021-10-15
Supplement: s1 [file s1]

Table S1. List of the 38 textural features measured in peritumoral and contralateral breast adipose tissue.

| Order        | Matrix                                   | Index                               |
|--------------|------------------------------------------|-------------------------------------|
| First-order  |                                          | SUV mean                            |
|              |                                          | SUV median                          |
|              |                                          | SUV standard deviation              |
|              |                                          | SUV skewness                        |
|              |                                          | SUV kurtosis                        |
|              |                                          | SUV histogram entropy               |
|              |                                          | SUV histogram energy                |
| Higher-order | Grey-level co-occurrence matrix          | Contrast                            |
|              |                                          | Correlation                         |
|              |                                          | Dissimilarity                       |
|              |                                          | Energy                              |
|              |                                          | Entropy                             |
|              |                                          | Homogeneity                         |
|              | Neighborhood grey-level different matrix | Busyness                            |
|              |                                          | Coarseness                          |
|              |                                          | Contrast                            |
|              | Grey-level run-length matrix             | Grey-level non-uniformity for run   |
|              |                                          | High grey-level run emphasis        |
|              |                                          | Long-run emphasis                   |
|              |                                          | Long-run high grey-level emphasis   |
|              |                                          | Long-run low grey-level emphasis    |
|              |                                          | Low grey-level run emphasis         |
|              |                                          | Run length non-uniformity           |
|              |                                          | Run percentage                      |
|              |                                          | Short-run emphasis                  |
|              |                                          | Short-run high grey-level emphasis  |
|              |                                          | Short-run low grey-level emphasis   |
|              | Grey-level zone-length matrix            | Grey-level non-uniformity for zone  |
|              |                                          | High grey-level zone emphasis       |
|              |                                          | Long-zone emphasis                  |
|              |                                          | Long-zone high grey-level emphasis  |
|              |                                          | Long-zone low grey-level emphasis   |
|              |                                          | Low grey-level zone emphasis        |
|              |                                          | Short-zone emphasis                 |
|              |                                          | Short-zone high grey-level emphasis |
|              |                                          | Short-zone low grey-level emphasis  |
|              |                                          | Zone length non-uniformity          |
|              |                                          | Zone percentage                     |

SUV, standardized uptake value

Table S2. Pairwise comparison of the 38 textural features between peritumoral and contralateral breast adipose tissue.

| Imaging feature                           | Peritumoral breast adipose tissue | Contralateral breast adipose tissue | P-value |
|-------------------------------------------|-----------------------------------|-------------------------------------|---------|
| SUV mean                                  | 0.71 ± 0.22                       | 0.39 ± 0.11                         | <0.001  |
| SUV median                                | 0.62 ± 0.19                       | 0.35 ± 0.11                         | <0.001  |
| SUV standard deviation                    | 0.36 ± 0.24                       | 0.16 ± 0.06                         | <0.001  |
| SUV skewness                              | 1.32 ± 0.71                       | 1.11 ± 0.54                         | <0.001  |
| SUV kurtosis                              | 5.72 ± 3.81                       | 4.55 ± 1.95                         | <0.001  |
| SUV histogram entropy                     | 1.91 ± 0.53                       | 1.21 ± 0.37                         | <0.001  |
| SUV histogram energy                      | 0.35 ± 0.12                       | 0.51 ± 0.14                         | <0.001  |
| GLCM contrast                             | 1.16 ± 1.61                       | 0.22 ± 0.10                         | <0.001  |
| GLCM correlation                          | 0.59 ± 0.13                       | 0.64 ± 0.15                         | <0.001  |
| GLCM dissimilarity                        | 0.60 ± 0.36                       | 0.22 ± 0.09                         | <0.001  |
| GLCM energy                               | 0.21 ± 0.12                       | 0.40 ± 0.16                         | <0.001  |
| GLCM entropy                              | 3.15 ± 0.91                       | 1.87 ± 0.57                         | <0.001  |
| GLCM homogeneity                          | 0.76 ± 0.09                       | 0.89 ± 0.04                         | <0.001  |
| NGLDM busyness                            | 3.77 ± 3.87                       | 84.48 ± 517.52                      | 0.005   |
| NGLDM coarseness                          | 0.03 ± 0.02                       | 0.01 ± 0.02                         | <0.001  |
| NGLDM contrast                            | 0.03 ± 0.01                       | 0.02 ± 0.01                         | <0.001  |
| GLRLM grey-level non-uniformity for run   | 115.51 ± 108.09                   | 359.47 ± 288.24                     | <0.001  |
| GLRLM high grey-level run emphasis        | 11.55 ± 9.45                      | 4.15 ± 1.62                         | <0.001  |
| GLRLM long-run emphasis                   | 3.98 ± 1.76                       | 14.78 ± 11.49                       | <0.001  |
| GLRLM long-run high grey-level emphasis   | 28.12 ± 12.10                     | 35.84 ± 15.12                       | <0.001  |
| GLRLM long-run low grey-level emphasis    | 1.20 ± 1.19                       | 10.41 ± 11.90                       | <0.001  |
| GLRLM low grey-level run emphasis         | 0.24 ± 0.12                       | 0.49 ± 0.16                         | <0.001  |
| GLRLM run length non-uniformity           | 222.95 ± 211.27                   | 216.51 ± 166.39                     | 0.643   |
| GLRLM run percentage                      | 0.66 ± 0.11                       | 0.40 ± 0.11                         | <0.001  |
| GLRLM short-run emphasis                  | 0.72 ± 0.11                       | 0.46 ± 0.11                         | <0.001  |
| GLRLM short-run high grey-level emphasis  | 9.99 ± 10.00                      | 2.40 ± 1.32                         | <0.001  |
| GLRLM short-run low grey-level emphasis   | 0.16 ± 0.06                       | 0.18 ± 0.05                         | <0.001  |
| GLZLM grey-level non-uniformity for zone  | 5.42 ± 4.60                       | 4.24 ± 2.87                         | <0.001  |
| GLZLM high grey-level zone emphasis       | 26.14 ± 27.30                     | 7.83 ± 3.83                         | <0.001  |
| GLZLM long-zone emphasis                  | 10335.97 ± 26150.45               | 662082.99 ± 1613753.04              | <0.001  |
| GLZLM long-zone high grey-level emphasis  | 49437.46 ± 120535.44              | 1118854.51 ± 2140316.99             | <0.001  |
| GLZLM long-zone low grey-level emphasis   | 3345.71 ± 9415.51                 | 556238.77 ± 153769.33               | <0.001  |
| GLZLM low grey-level zone emphasis        | 0.19 ± 0.13                       | 0.35 ± 0.15                         | <0.001  |
| GLZLM short-zone emphasis                 | 0.39 ± 0.16                       | 0.25 ± 0.14                         | <0.001  |
| GLZLM short-zone high grey-level emphasis | 15.09 ± 22.31                     | 2.50 ± 2.10                         | <0.001  |
| GLZLM short-zone low grey-level emphasis  | 0.05 ± 0.05                       | 0.08 ± 0.09                         | <0.001  |
| GLZLM zone length non-uniformity          | 8.42 ± 12.46                      | 2.10 ± 1.91                         | <0.001  |
| GLZLM zone percentage                     | 0.06 ± 0.05                       | 0.01 ± 0.01                         | <0.001  |

All data are expressed in mean ± standard deviation

GLCM, grey-level co-occurrence matrix; GLRLM, grey-level run-length matrix; GLZLM, grey-level zone-length matrix; NGLDM, neighborhood grey-level different matrix; SUV, standardized uptake value

Table S3. Comparison of the 38 textural features of peritumoral breast adipose tissue between the patients with and without axillary lymph node metastasis.

| Imaging feature                           | Patients with axillary lymph node metastasis (n=119) | Patients with no axillary lymph node metastasis (n=207) | P-value |
|-------------------------------------------|------------------------------------------------------|---------------------------------------------------------|---------|
| SUV mean                                  | 0.83 ± 0.24                                          | 0.64 ± 0.18                                             | <0.001  |
| SUV median                                | 0.70 ± 0.20                                          | 0.57 ± 0.16                                             | <0.001  |
| SUV standard deviation                    | 0.45 ± 0.24                                          | 0.31 ± 0.22                                             | <0.001  |
| SUV skewness                              | 1.55 ± 0.76                                          | 1.20 ± 0.66                                             | <0.001  |
| SUV kurtosis                              | 6.86 ± 4.97                                          | 5.07 ± 2.76                                             | <0.001  |
| SUV histogram entropy                     | 2.27 ± 0.48                                          | 1.71 ± 0.44                                             | <0.001  |
| SUV histogram energy                      | 0.30 ± 0.10                                          | 0.38 ± 0.12                                             | <0.001  |
| GLCM contrast                             | 1.83 ± 2.19                                          | 0.77 ± 0.97                                             | <0.001  |
| GLCM correlation                          | 0.59 ± 0.12                                          | 0.59 ± 0.14                                             | 0.508   |
| GLCM dissimilarity                        | 0.76 ± 0.40                                          | 0.51 ± 0.31                                             | <0.001  |
| GLCM energy                               | 0.16 ± 0.10                                          | 0.24 ± 0.13                                             | <0.001  |
| GLCM entropy                              | 3.78 ± 0.79                                          | 2.79 ± 0.77                                             | <0.001  |
| GLCM homogeneity                          | 0.72 ± 0.09                                          | 0.78 ± 0.08                                             | <0.001  |
| NGLDM busyness                            | 2.77 ± 3.31                                          | 4.35 ± 4.06                                             | <0.001  |
| NGLDM coarseness                          | 0.02 ± 0.02                                          | 0.03 ± 0.02                                             | 0.028   |
| NGLDM contrast                            | 0.03 ± 0.02                                          | 0.02 ± 0.01                                             | 0.001   |
| GLRLM grey-level non-uniformity for run   | 131.89 ± 153.92                                      | 106.10 ± 67.95                                          | 0.085   |
| GLRLM high grey-level run emphasis        | 15.22 ± 9.71                                         | 9.45 ± 8.64                                             | <0.001  |
| GLRLM long-run emphasis                   | 3.35 ± 1.43                                          | 4.34 ± 1.83                                             | <0.001  |
| GLRLM long-run high grey-level emphasis   | 30.93 ± 12.88                                        | 26.50 ± 11.35                                           | 0.002   |
| GLRLM long-run low grey-level emphasis    | 0.81 ± 0.68                                          | 1.43 ± 1.35                                             | <0.001  |
| GLRLM low grey-level run emphasis         | 0.19 ± 0.10                                          | 0.27 ± 0.12                                             | <0.001  |
| GLRLM run length non-uniformity           | 235.62 ± 272.36                                      | 211.15 ± 148.83                                         | 0.065   |
| GLRLM run percentage                      | 0.70 ± 0.09                                          | 0.63 ± 0.11                                             | <0.001  |
| GLRLM short-run emphasis                  | 0.77 ± 0.08                                          | 0.69 ± 0.11                                             | <0.001  |
| GLRLM short-run high grey-level emphasis  | 13.37 ± 9.62                                         | 8.05 ± 9.72                                             | <0.001  |
| GLRLM short-run low grey-level emphasis   | 0.14 ± 0.06                                          | 0.17 ± 0.06                                             | <0.001  |
| GLZLM grey-level non-uniformity for zone  | 7.42 ± 5.83                                          | 4.27 ± 3.22                                             | <0.001  |
| GLZLM high grey-level zone emphasis       | 35.46 ± 25.27                                        | 20.78 ± 27.03                                           | <0.001  |
| GLZLM long-zone emphasis                  | 6961.32 ± 24194.57                                   | 12275.98 ± 27077.84                                     | 0.069   |
| GLZLM long-zone high grey-level emphasis  | 40100.36 ± 118258.97                                 | 54805.16 ± 121784.21                                    | 0.286   |
| GLZLM long-zone low grey-level emphasis   | 1749.50 ± 7270.90                                    | 4263.34 ± 10355.35                                      | 0.011   |
| GLZLM low grey-level zone emphasis        | 0.13 ± 0.09                                          | 0.22 ± 0.14                                             | <0.001  |
| GLZLM short-zone emphasis                 | 0.45 ± 0.13                                          | 0.36 ± 0.16                                             | <0.001  |
| GLZLM short-zone high grey-level emphasis | 21.65 ± 20.77                                        | 11.33 ± 22.34                                           | <0.001  |
| GLZLM short-zone low grey-level emphasis  | 0.04 ± 0.04                                          | 0.06 ± 0.06                                             | 0.004   |
| GLZLM zone length non-uniformity          | 14.69 ± 17.27                                        | 4.82 ± 6.19                                             | <0.001  |
| GLZLM zone percentage                     | 0.08 ± 0.05                                          | 0.04 ± 0.04                                             | <0.001  |

All data are expressed in mean ± standard deviation

GLCM, grey-level co-occurrence matrix; GLRLM, grey-level run-length matrix; GLZLM, grey-level zone-length

matrix; NGLDM, neighborhood grey-level different matrix; SUV, standardized uptake value

Table S4. Correlation of the primary tumor size with the 38 textural features of peritumoral breast adipose tissue.

| Imaging features                          | P-value | Correlation coefficient |
|-------------------------------------------|---------|-------------------------|
| SUV mean                                  | <0.001  | 0.390                   |
| SUV median                                | <0.001  | 0.333                   |
| SUV standard deviation                    | <0.001  | 0.424                   |
| SUV skewness                              | 0.010   | 0.180                   |
| SUV kurtosis                              | 0.010   | 0.181                   |
| SUV histogram entropy                     | <0.001  | 0.383                   |
| SUV histogram energy                      | <0.001  | -0.399                  |
| GLCM contrast                             | <0.001  | 0.379                   |
| GLCM correlation                          | 0.177   | 0.098                   |
| GLCM dissimilarity                        | <0.001  | 0.363                   |
| GLCM energy                               | <0.001  | -0.359                  |
| GLCM entropy                              | <0.001  | 0.352                   |
| GLCM homogeneity                          | <0.001  | -0.339                  |
| NGLDM busyness                            | 0.063   | -0.103                  |
| NGLDM coarseness                          | <0.001  | -0.402                  |
| NGLDM contrast                            | 0.016   | 0.133                   |
| GLRLM grey-level non-uniformity for run   | 0.055   | 0.117                   |
| GLRLM high grey-level run emphasis        | <0.001  | 0.423                   |
| GLRLM long-run emphasis                   | <0.001  | -0.248                  |
| GLRLM long-run high grey-level emphasis   | <0.001  | 0.274                   |
| GLRLM long-run low grey-level emphasis    | <0.001  | -0.266                  |
| GLRLM low grey-level run emphasis         | <0.001  | -0.322                  |
| GLRLM run length non-uniformity           | 0.114   | 0.101                   |
| GLRLM run percentage                      | <0.001  | 0.281                   |
| GLRLM short-run emphasis                  | <0.001  | 0.346                   |
| GLRLM short-run high grey-level emphasis  | <0.001  | 0.440                   |
| GLRLM short-run low grey-level emphasis   | <0.001  | -0.306                  |
| GLZLM grey-level non-uniformity for zone  | <0.001  | 0.549                   |
| GLZLM high grey-level zone emphasis       | <0.001  | 0.457                   |
| GLZLM long-zone emphasis                  | 0.030   | -0.164                  |
| GLZLM long-zone high grey-level emphasis  | 0.087   | -0.095                  |
| GLZLM long-zone low grey-level emphasis   | <0.001  | -0.195                  |
| GLZLM low grey-level zone emphasis        | <0.001  | -0.434                  |
| GLZLM short-zone emphasis                 | <0.001  | 0.387                   |
| GLZLM short-zone high grey-level emphasis | <0.001  | 0.451                   |
| GLZLM short-zone low grey-level emphasis  | 0.318   | -0.055                  |
| GLZLM zone length non-uniformity          | <0.001  | 0.501                   |
| GLZLM zone percentage                     | <0.001  | 0.348                   |

GLCM, grey-level co-occurrence matrix; GLRLM, grey-level run-length matrix; GLZLM, grey-level zone-length

matrix; NGLDM, neighborhood grey-level different matrix; SUV, standardized uptake value

Table S5. Correlation of molecular subtypes of the primary tumors with the 38 textural features of peritumoral breast adipose tissue.

| Imaging features                         | P-value | Luminal A                        | Luminal B                        | HER2-enriched<br>(non-luminal)  | Triple negative                |
|------------------------------------------|---------|----------------------------------|----------------------------------|---------------------------------|--------------------------------|
| SUV mean                                 | <0.001① | 0.62 (0.52–0.76)                 | 0.65 (0.54–0.79)                 | 0.79 (0.65–0.95)                | 0.77 (0.65–0.92)               |
| SUV median                               | <0.001① | 0.53 (0.44–0.68)                 | 0.56 (0.46–0.70)                 | 0.69 (0.57–0.82)                | 0.66 (0.55–0.80)               |
| SUV standard deviation                   | <0.001② | 0.28 (0.20–0.34)                 | 0.28 (0.22–0.39)                 | 0.38 (0.25–0.52)                | 0.39 (0.32–0.55)               |
| SUV skewness                             | 0.004③  | 1.22 (0.76–1.67)                 | 1.20 (0.83–1.65)                 | 1.25 (0.87–1.84)                | 1.58 (1.16–2.12)               |
| SUV kurtosis                             | 0.002③  | 4.41 (3.13–6.30)                 | 4.35 (3.47–6.16)                 | 5.07 (3.69–7.29)                | 6.27 (4.34–9.20)               |
| SUV histogram entropy                    | <0.001② | 1.72 (1.45–2.05)                 | 1.86 (1.59–2.17)                 | 2.09 (1.66–2.41)                | 2.05 (1.81–2.54)               |
| SUV histogram energy                     | <0.001② | 0.36 (0.29–0.45)                 | 0.34 (0.28–0.41)                 | 0.29 (0.22–0.38)                | 0.29 (0.22–0.33)               |
| GLCM contrast                            | <0.001② | 0.53 (0.33–0.83)                 | 0.68 (0.39–1.04)                 | 0.86 (0.47–1.92)                | 1.03 (0.69–1.98)               |
| GLCM correlation                         | 0.432   | 0.64 (0.54–0.69)                 | 0.59 (0.49–0.68)                 | 0.62 (0.47–0.69)                | 0.62 (0.53–0.69)               |
| GLCM dissimilarity                       | <0.001② | 0.43 (0.31–0.61)                 | 0.52 (0.35–0.65)                 | 0.58 (0.39–0.92)                | 0.65 (0.51–0.86)               |
| GLCM energy                              | <0.001③ | 0.20 (0.15–0.31)                 | 0.19 (0.14–0.26)                 | 0.17 (0.09–0.23)                | 0.15 (0.09–0.19)               |
| GLCM entropy                             | 0.001③  | 2.83 (2.35–3.48)                 | 2.96 (2.56–3.62)                 | 3.21 (2.70–4.34)                | 3.38 (2.88–4.32)               |
| GLCM homogeneity                         | <0.001② | 0.80 (0.74–0.85)                 | 0.77 (0.72–0.83)                 | 0.74 (0.65–0.81)                | 0.72 (0.68–0.79)               |
| NGLDM busyness                           | 0.124   | 2.89 (1.86–4.78)                 | 2.75 (1.85–4.31)                 | 2.52 (1.06–4.57)                | 1.86 (1.15–3.95)               |
| NGLDM coarseness                         | 0.002③  | 0.02 (0.02–0.03)                 | 0.02 (0.01–0.03)                 | 0.02 (0.01–0.03)                | 0.01 (0.01–0.02)               |
| NGLDM contrast                           | 0.415   | 0.02 (0.01–0.03)                 | 0.02 (0.02–0.03)                 | 0.02 (0.01–0.03)                | 0.02 (0.02–0.03)               |
| GLRLM grey-level non-uniformity for run  | 0.287   | 81.78 (57.75–121.89)             | 90.98 (64.86–125.17)             | 87.03 (64.79–166.56)            | 104.79 (72.11–148.20)          |
| GLRLM high grey-level run emphasis       | <0.001① | 8.04 (5.79–10.74)                | 9.08 (6.47–12.70)                | 12.43 (7.82–18.15)              | 12.49 (9.12–18.57)             |
| GLRLM long-run emphasis                  | 0.008④  | 4.02 (2.75–5.70)                 | 3.46 (2.82–4.84)                 | 3.11 (2.34–4.37)                | 2.97 (2.43–3.85)               |
| GLRLM long-run high grey-level emphasis  | 0.367   | 26.17 (21.51–0.42)               | 26.22 (20.64–30.47)              | 28.07 (22.97–38.32)             | 27.20 (21.91–33.85)            |
| GLRLM long-run low grey-level emphasis   | 0.007⑤  | 1.15 (0.53–1.96)                 | 0.85 (0.50–1.50)                 | 0.60 (0.38–1.15)                | 0.76 (0.42–1.06)               |
| GLRLM low grey-level run emphasis        | <0.001⑥ | 0.26 (0.17–0.33)                 | 0.22 (0.15–0.33)                 | 0.18 (0.12–0.21)                | 0.19 (0.12–0.28)               |
| GLRLM run length non-uniformity          | <0.001① | 128.33 (89.06–197.60)            | 151.18 (100.36–246.12)           | 220.22 (154.72–363.45)          | 259.83 (178.87–417.47)         |
| GLRLM run percentage                     | 0.006⑦  | 0.63 (0.53–.72)                  | 0.67 (0.58–0.72)                 | 0.71 (0.61–0.78)                | 0.71 (0.63–0.77)               |
| GLRLM short-run emphasis                 | <0.001⑦ | 0.70 (0.60–0.78)                 | 0.74 (0.64–0.79)                 | 0.79 (0.69–0.84)                | 0.79 (0.71–0.82)               |
| GLRLM short-run high grey-level emphasis | <0.001① | 6.23 (3.90–9.06)                 | 7.37 (4.77–11.05)                | 11.22 (6.33–15.28)              | 10.64 (7.48–17.09)             |
| GLRLM short-run low grey-level emphasis  | <0.001⑥ | 0.16 (0.13–0.21)                 | 0.16 (0.11–0.21)                 | 0.12 (0.09–0.15)                | 0.13 (0.09–0.20)               |
| GLZLM grey-level non-uniformity for zone | <0.001⑧ | 2.89 (1.93–4.33)                 | 4.05 (2.60–5.85)                 | 6.32 (3.32–8.91)                | 6.77 (4.26–12.88)              |
| GLZLM high grey-level zone emphasis      | <0.001① | 15.19 (9.45–23.29)               | 17.22 (11.67–27.52)              | 27.80 (14.36–49.95)             | 27.55 (21.29–43.98)            |
| GLZLM long-zone emphasis                 | 0.019④  | 4428.92 (1628.29–<br>14948.90)   | 3423.44 (1675.49–<br>7196.58)    | 2651.08 (934.901–<br>6236.75)   | 1820.45 (923.71–<br>4305.92)   |
| GLZLM long-zone high grey-level emphasis | 0.068   | 24335.86 (11644.71–<br>62788.31) | 19646.19 (10254.94–<br>41243.34) | 16286.62 (6725.68–<br>48634.24) | 12087.05 (6839.86–<br>0189.84) |
| GLZLM long-zone low grey-level emphasis  | 0.141   | 1067.27 (343.51–<br>4951.36)     | 820.83 (291.52–2347.24)          | 407.13 (161.31–1283.50)         | 403.23 (174.91–521.02)         |

|                                           |         |                   |                   |                    |                    |
|-------------------------------------------|---------|-------------------|-------------------|--------------------|--------------------|
| GLZLM low grey-level zone emphasis        | <0.001① | 0.19 (0.12–0.28)  | 0.16 (0.10–0.26)  | 0.11 (0.06–0.22)   | 0.09 (0.06–0.14)   |
| GLZLM short-zone emphasis                 | <0.001⑧ | 0.31 (0.17–0.44)  | 0.40 (0.30–0.49)  | 0.51 (0.41–0.58)   | 0.52 (0.39–0.56)   |
| GLZLM short-zone high grey-level emphasis | <0.001① | 5.30 (2.21–11.43) | 7.95 (3.86–14.37) | 15.27 (6.65–39.25) | 18.01 (11.56–8.37) |
| GLZLM short-zone low grey-level emphasis  | 0.062   | 0.03 (0.01–0.05)  | 0.03 (0.02–0.06)  | 0.03 (0.02–0.08)   | 0.02 (0.01–0.04)   |
| GLZLM zone length non-uniformity          | <0.001⑧ | 1.92 (1.22–6.97)  | 3.39 (1.80–8.38)  | 7.54 (2.54–15.69)  | 9.13 (4.87–19.49)  |
| GLZLM zone percentage                     | <0.001② | 0.03 (0.02–0.05)  | 0.04 (0.03–0.06)  | 0.06 (0.03–0.10)   | 0.8 (0.05–0.10)    |

GLCM, grey-level co-occurrence matrix; GLRLM, grey-level run-length matrix; GLZLM, grey-level zone-length matrix; NGLDM, neighborhood grey-level different matrix; SUV, standardized uptake value

① On post-hoc analysis, patients with HER2-enriched and triple negative breast cancers showed significantly different values from those with luminal A and B breast cancers (p<0.05).

② On post-hoc analysis, patients with triple negative breast cancer showed significantly different values from those with luminal A and B breast cancers (p<0.05), and patients with HER2-enriched breast cancer showed significantly different values from those with luminal A breast cancer (p<0.05). .

③ On post-hoc analysis, patients with triple negative breast cancer showed significantly different values from those with luminal A and B breast cancers (p<0.05).

④ On post-hoc analysis, patients with triple negative breast cancer showed significantly different values from those with luminal A breast cancer (p<0.05).

⑤ On post-hoc analysis, patients with HER2-enriched breast cancer showed significantly different values from those with luminal A breast cancer (p<0.05).

⑥ On post-hoc analysis, patients with HER2-enriched breast cancer showed significantly different values from those with luminal A and B breast cancers (p<0.05).

⑦ On post-hoc analysis, patients with HER2-enriched and triple negative breast cancers showed significantly different values from those with luminal A breast cancer (p<0.05).

⑧ On post-hoc analysis, patients with HER2-enriched and triple negative breast cancers showed significantly different values from those with luminal A and B breast cancers (p<0.05), and patients with luminal B breast cancer showed significantly different values from those with luminal A breast cancer (p<0.05).

Table S6. Diagnostic ability of the primary tumor parameters and textural features of FDG PET/CT with AUC values <0.750 for predicting axillary lymph node metastasis

| Parameters                                            | Cut-off value | AUC (95% CI)        | Sensitivity (%) | Specificity (%) | PPV (%) | NPV (%) |
|-------------------------------------------------------|---------------|---------------------|-----------------|-----------------|---------|---------|
| Primary tumor parameters                              |               |                     |                 |                 |         |         |
| Tumor size                                            | 1.7           | 0.693 (0.640–0.742) | 76.5            | 50.2            | 46.9    | 78.8    |
| Maximum SUV of primary tumor                          | 3.38          | 0.750 (0.699–0.796) | 83.2            | 59.4            | 54.1    | 86.0    |
| Peritumoral breast adipose tissue textural parameters |               |                     |                 |                 |         |         |
| SUV mean                                              | 0.72          | 0.747 (0.696–0.793) | 68.9            | 72.5            | 59.0    | 80.2    |
| SUV median                                            | 0.54          | 0.702 (0.649–0.751) | 80.7            | 47.8            | 47.1    | 81.1    |
| SUV standard deviation                                | 0.33          | 0.747 (0.697–0.794) | 69.9            | 73.0            | 59.4    | 80.3    |
| SUV skewness                                          | 1.36          | 0.634 (0.580–0.687) | 58.0            | 66.7            | 50.0    | 73.4    |
| SUV kurtosis                                          | 4.97          | 0.639 (0.584–0.691) | 60.5            | 62.8            | 48.3    | 73.4    |
| SUV histogram energy                                  | 0.34          | 0.715 (0.663–0.764) | 77.3            | 58.0            | 51.4    | 81.6    |
| GLCM dissimilarity                                    | 0.51          | 0.740 (0.689–0.787) | 77.3            | 63.8            | 55.1    | 83.0    |
| GLCM energy                                           | 0.21          | 0.714 (0.662–0.763) | 83.2            | 52.7            | 50.3    | 84.5    |
| GLCM homogeneity                                      | 0.78          | 0.724 (0.672–0.772) | 78.2            | 59.9            | 52.8    | 82.7    |
| NGLDM busyness                                        | 1.76          | 0.654 (0.599–0.705) | 42.0            | 81.6            | 56.8    | 71.0    |
| NGLDM coarseness                                      | 0.02          | 0.594 (0.538–0.648) | 71.4            | 48.3            | 44.3    | 74.6    |
| NGLDM contrast                                        | 0.03          | 0.586 (0.530–0.640) | 52.1            | 68.6            | 48.8    | 71.4    |
| GLRLM long-run emphasis                               | 3.46          | 0.677 (0.624–0.728) | 69.7            | 61.4            | 50.9    | 77.9    |
| GLRLM long-run high grey-level emphasis               | 24.14         | 0.620 (0.565–0.673) | 72.3            | 48.8            | 44.8    | 75.4    |
| GLRLM long-run low grey-level emphasis                | 1.30          | 0.678 (0.625–0.729) | 89.1            | 42.5            | 47.1    | 87.1    |
| GLRLM low grey-level run emphasis                     | 0.20          | 0.694 (0.641–0.744) | 67.2            | 63.3            | 51.1    | 77.1    |
| GLRLM run percentage                                  | 0.65          | 0.689 (0.635–0.739) | 74.8            | 57.0            | 50.0    | 79.7    |
| GLRLM short-run emphasis                              | 0.73          | 0.703 (0.657–0.755) | 74.8            | 59.9            | 51.7    | 80.5    |
| GLRLM short-run low grey-level emphasis               | 0.15          | 0.672 (0.618–0.723) | 67.2            | 61.8            | 50.3    | 76.6    |
| GLZLM grey-level non-uniformity for zone              | 5.19          | 0.703 (0.650–0.752) | 58.8            | 75.8            | 58.3    | 76.2    |
| GLZLM long-zone low grey-level emphasis               | 925.03        | 0.671 (0.617–0.721) | 74.8            | 52.2            | 47.3    | 78.3    |
| GLZLM low grey-level zone emphasis                    | 0.17          | 0.731 (0.685–0.781) | 79.0            | 57.0            | 51.4    | 82.5    |
| GLZLM short-zone emphasis                             | 0.39          | 0.660 (0.606–0.711) | 71.4            | 56.0            | 48.3    | 77.3    |
| GLZLM short-zone high grey-level emphasis             | 12.74         | 0.748 (0.697–0.794) | 62.2            | 78.7            | 62.7    | 78.4    |
| GLZLM short-zone low grey-level emphasis              | 0.03          | 0.558 (0.502–0.613) | 52.9            | 60.4            | 43.4    | 69.1    |
| GLZLM zone percentage                                 | 0.03          | 0.722 (0.670–0.770) | 93.3            | 41.6            | 47.8    | 91.5    |

AUC, area under the receiver operating characteristic curve; CI, confidence interval; GLCM, grey-level co-occurrence matrix; GLRLM, grey-level run-length matrix; GLZLM, grey-level zone-length matrix; NGLDM, neighborhood grey-level different matrix; NPV, negative predictive value; PPV, positive predictive value; SUV, standardized uptake value
